# Supplementary material for: Optical frequency comb-based measurements and the revisited assignment of high-resolution spectra of CH2Br2 in the 2960 to 3120 cm−1 region
Source: Royal Society of Chemistry journal article supplement (doi:10.1039/d2cp05881b), 2023-01-01
Supplement: d2cp05881b4.pdf [file d2cp05881b4.pdf]

## Supplementary Material

### **Optical frequency comb-based measurements and revisited assignment of high-resolution spectra of CH<sub>2</sub>Br<sub>2</sub> in the 2960 to 3120 cm<sup>-1</sup> region**

Ibrahim Sadiek, Adrian Hjältén, Frances C. Roberts, Julia H. Lehman and Aleksandra Foltynowicz

- S1 PGOPHER input file (*see file "revisited\_CH2Br2\_linefit.pgo"*).
- S2 Measured absorption-cross section data by the two comb-based setups (*see files "Absorption\_cross\_section\_FTS.txt" and "Absorption\_cross\_section\_VIPA.txt"*).
- S3 Anharmonic vibrational frequencies of the CH<sub>2</sub><sup>81</sup>Br<sub>2</sub>, and CH<sub>2</sub><sup>79</sup>Br<sub>2</sub> isotopologues calculated at different model chemistries together with the estimated isotopic shifts (*this file*).
- S4 Anharmonic rotational constants of the three isotopologue of CH<sub>2</sub>Br<sub>2</sub> in its vibrational ground  $v(v = 0)$  and first excited state  $v(v = 1)$  of  $v_4$  and  $v_6$  (*this file*).
- S5 Semi empirical rotational constants used as an input for the simulations of the twelve vibrational states of CH<sub>2</sub>Br<sub>2</sub> in the C-H stretch region (*this file*).

S3: Anharmonic vibrational frequencies of the CH<sub>2</sub><sup>81</sup>Br<sub>2</sub> and CH<sub>2</sub><sup>79</sup>Br<sub>2</sub> isotopologues of CH<sub>2</sub>Br<sub>2</sub> calculated at different model chemistries together with the estimated isotopic shifts relative to their two mass unit isotopic shift. The available experimental data are included for comparison. All values are given in cm<sup>-1</sup>.

|                |                                                   | B3LYP/6-311++G(d,p) | M06/6-311++G(d,p) | wB97X/def-2QZVPP | MP2/6-311++G(d,p) | Previous Experiments  |
|----------------|---------------------------------------------------|---------------------|-------------------|------------------|-------------------|-----------------------|
| v <sub>4</sub> | v(CH <sub>2</sub> <sup>81</sup> Br <sub>2</sub> ) | 163.962             | 166.258           | 174.527          | 173.654           |                       |
|                | v(CH <sub>2</sub> <sup>79</sup> Br <sub>2</sub> ) | 165.886             | 168.218           | 176.549          | 175.69            |                       |
|                | Isotopic shift                                    | 1.924               | 1.96              | 2.022            | 2.036             |                       |
| v <sub>8</sub> | v(CH <sub>2</sub> <sup>81</sup> Br <sub>2</sub> ) | 1206.259            | 1202.001          | 1229.934         | 1238.769          | 1196.931 <sup>a</sup> |
|                | v(CH <sub>2</sub> <sup>79</sup> Br <sub>2</sub> ) | 1206.313            | 1202.056          | 1230.004         | 1238.826          | 1196.983 <sup>a</sup> |
|                | Isotopic shift                                    | 0.054               | 0.055             | 0.07             | 0.057             | 0.052 <sup>a</sup>    |
| v <sub>1</sub> | v(CH <sub>2</sub> <sup>81</sup> Br <sub>2</sub> ) | 3017.165            | 3001.021          | 3116.307         | 3041.905          |                       |
|                | v(CH <sub>2</sub> <sup>79</sup> Br <sub>2</sub> ) | 3017.167            | 3001.016          | 3116.302         | 3041.907          |                       |
|                | Isotopic shift                                    | 0.002               | -0.005            | -0.005           | 0.002             |                       |
| v <sub>6</sub> | v(CH <sub>2</sub> <sup>81</sup> Br <sub>2</sub> ) | 3083.714            | 3074.873          | 3178.094         | 3106.585          | 3076.731 <sup>b</sup> |
|                | v(CH <sub>2</sub> <sup>79</sup> Br <sub>2</sub> ) | 3083.719            | 3074.868          | 3178.091         | 3106.585          | 3077.406 <sup>b</sup> |
|                | Isotopic shift                                    | 0.005               | -0.005            | -0.003           | 0                 | 0.675 <sup>b</sup>    |

<sup>a</sup>: Experimental data of Brumfield et al.; <sup>b</sup>: Sadiek and Friedrichs

S4: Anharmonic rotational constants of the three isotopologue of CH<sub>2</sub>Br<sub>2</sub> in its vibrational ground v(v = 0) and first excited state v(v = 1) of v<sub>4</sub> and v<sub>6</sub>. All values are given in units of cm<sup>-1</sup> as calculated at the wB97X/Def2QZVPP

|                                                   | v <sub>1</sub> (v = 0) | v <sub>6</sub> (v = 1) | Δ <sub>6</sub> /10 <sup>-6</sup> <sup>a</sup> | v <sub>4</sub> (v = 1) | Δ <sub>4</sub> /10 <sup>-6</sup> | v <sub>4+6</sub> (v = 1) | Δ <sub>(4+6)</sub> /10 <sup>-6</sup> <sup>a</sup> |
|---------------------------------------------------|------------------------|------------------------|-----------------------------------------------|------------------------|----------------------------------|--------------------------|---------------------------------------------------|
| CH <sub>2</sub> <sup>79</sup> Br <sup>79</sup> Br |                        |                        |                                               |                        |                                  |                          |                                                   |
| A                                                 | 0.883522               | 0.882879               | 643                                           | 0.887190               | -3668                            | 0.886546                 | -3024                                             |
| B                                                 | 0.041172               | 0.041193               | -21                                           | 0.041155               | 17                               | 0.041176                 | -4                                                |
| C                                                 | 0.039641               | 0.039660               | -19                                           | 0.039621               | 20                               | 0.039640                 | 1                                                 |
| CH <sub>2</sub> <sup>79</sup> Br <sup>81</sup> Br |                        |                        |                                               |                        |                                  |                          |                                                   |
| A                                                 | 0.882735               | 0.882093               | 642                                           | 0.886373               | -3638                            | 0.885731                 | -2996                                             |
| B                                                 | 0.040666               | 0.040686               | -20                                           | 0.040649               | 17                               | 0.040669                 | -3                                                |
| C                                                 | 0.039170               | 0.039189               | -19                                           | 0.039150               | 20                               | 0.039169                 | 1                                                 |
| CH <sub>2</sub> <sup>81</sup> Br <sup>81</sup> Br |                        |                        |                                               |                        |                                  |                          |                                                   |
| A                                                 | 0.881945               | 0.881305               | 640                                           | 0.885554               | -3609                            | 0.884914                 | -2969                                             |
| B                                                 | 0.040160               | 0.040181               | -21                                           | 0.040143               | 17                               | 0.040164                 | -4                                                |
| C                                                 | 0.038699               | 0.038718               | -19                                           | 0.038680               | 19                               | 0.038699                 | 0                                                 |

<sup>a</sup> Δ<sub>i</sub> = X(v<sub>i</sub>(v = 1)) - X(v<sub>i</sub>(v = 0)) (with X = A, B, C).

S5: Semi empirical rotational constants used as an input for the simulations of the twelve vibrational states of CH<sub>2</sub>Br<sub>2</sub> in the C-H stretch region. The v<sub>6</sub> fundamental band involve v<sub>6</sub>(v = 1) ← v<sub>6</sub>Exp(v = 0) transition and nv<sub>4</sub>+n<sub>6</sub>-nv<sub>4</sub> hot bands involve v<sub>4+6</sub>(v = n) ← v<sub>4</sub>(v = n), with n = 1-3.

|                                                   | v <sub>Exp</sub> (v = 0) <sup>a</sup> | v <sub>6</sub> (v = 1) <sup>b</sup> | v <sub>4</sub> (v = 1) <sup>b</sup> | v <sub>4</sub> (v = 2) <sup>b</sup> | v <sub>4</sub> (v = 3) <sup>b</sup> | v <sub>4+6</sub> (v = 1) <sup>b</sup> | v <sub>4+6</sub> (v = 2) <sup>b</sup> | v <sub>4+6</sub> (v = 3) <sup>b</sup> |
|---------------------------------------------------|---------------------------------------|-------------------------------------|-------------------------------------|-------------------------------------|-------------------------------------|---------------------------------------|---------------------------------------|---------------------------------------|
| CH <sub>2</sub> <sup>79</sup> Br <sup>79</sup> Br |                                       |                                     |                                     |                                     |                                     |                                       |                                       |                                       |
| A                                                 | 0.8683441                             | 0.8677011                           | 0.8720121                           | 0.8756801                           | 0.8793481                           | 0.8713681                             | 0.8750371                             | 0.8787051                             |
| B                                                 | 0.0413131                             | 0.0413341                           | 0.0412961                           | 0.0412791                           | 0.0412621                           | 0.0413171                             | 0.0413001                             | 0.0412831                             |
| C                                                 | 0.0397255                             | 0.0397445                           | 0.0397055                           | 0.0396855                           | 0.0396655                           | 0.0397245                             | 0.0397045                             | 0.0396845                             |
| CH <sub>2</sub> <sup>79</sup> Br <sup>81</sup> Br |                                       |                                     |                                     |                                     |                                     |                                       |                                       |                                       |
| A                                                 | 0.8675192                             | 0.8668772                           | 0.8711572                           | 0.8747952                           | 0.8784332                           | 0.8705152                             | 0.8741532                             | 0.8777912                             |
| B                                                 | 0.0408047                             | 0.0408247                           | 0.0407877                           | 0.0407707                           | 0.0407537                           | 0.0408077                             | 0.0407907                             | 0.0407737                             |
| C                                                 | 0.0392537                             | 0.0392727                           | 0.0392337                           | 0.0392137                           | 0.0391937                           | 0.0392527                             | 0.0392327                             | 0.0392127                             |
| CH <sub>2</sub> <sup>81</sup> Br <sup>81</sup> Br |                                       |                                     |                                     |                                     |                                     |                                       |                                       |                                       |
| A                                                 | 0.8667564                             | 0.8661164                           | 0.8703654                           | 0.8739744                           | 0.8775834                           | 0.8697254                             | 0.8733344                             | 0.8769434                             |
| B                                                 | 0.0402973                             | 0.0403183                           | 0.0402803                           | 0.0402633                           | 0.0402463                           | 0.0403013                             | 0.0402843                             | 0.0402673                             |
| C                                                 | 0.0387823                             | 0.0388013                           | 0.0387633                           | 0.0387443                           | 0.0387253                           | 0.0387823                             | 0.0387633                             | 0.0387443                             |

<sup>a</sup> Vibrational ground state data of Niide et al.

<sup>b</sup> X(v<sub>i</sub>(v = n)) = X<sub>Exp</sub>((v = 0)) + nΔ<sub>i</sub>(v = n) (with X = A, B, C, and n = 1-3).
